# Supplementary material for: Promoter-Wide Hypermethylation of the Ribosomal RNA Gene Promoter in the Suicide Brain
Source: PubMed Central journal article supplement (PMC2330072; doi:10.1371/journal.pone.0002085), 2008-05-07

|             |            |            |            |            |            |            |            |
|-------------|------------|------------|------------|------------|------------|------------|------------|
|             |            | 160        |            | 180        |            | 200        |            |
| U13369      | GGAGGTATAT | CTTTCGCTCC | GAGTCGGCA  | TTTTGGGCCG | CCGGGTTAT  | TGCTGACACG | CTGTCCTCTG |
| ID 4097386  | GGAGGTATAT | CTTTCGCTCC | GAGTCGGCA- | TTTTGGGCCG | CCGGGTTAT- | TGCTGACACG | CTGTCCTCTG |
| ID 4097387  | GGAGGTATAT | CTTTCGCTCC | GAGTCGGCA- | TTTTGGGCCG | CCGGGTTAT- | TGCTGACACG | CTGTCCTCTG |
| ID 4097397  | GGAGGTATAT | CTTTCGCTCC | GAGTCGGCA- | TTTTGGGCCG | CCGGGTTAT- | TGCTGACACG | CTGTCCTCTG |
| ID 4097398  | GGAGGTATAT | CTTTCGCTCC | GAGTCGGCA- | TTTTGGGCCG | CCGGGTTAT- | TGCTGACACG | CTGTCCTCTG |
| ID 4097401  | GGAGGTATAT | CTTTCGCTCC | GAGTCGGCA- | TTTTGGGCCG | CCGGGTTAT- | TGCTGACACG | CTGTCCTCTG |
| ID 4097408m | GGAGGTATAT | CTTTCGCTCC | GAGTCGGCA- | TTTTGGGCCG | CCGGGTTAT- | TGCTGACACG | CTGTCCTCTG |
| ID 4097409  | GGAGGTATAT | CTTTCGCTCC | GAGTCGGCA- | TTTTGGGCCG | CCGGGTTAT- | TGCTGACACG | CTGTCCTCTG |
| ID 4097412  | GGAGGTATAT | CTTTCGCTCC | GAGTCGGCA- | TTTTGGGCCG | CCGGGTTAT- | TGCTGACACG | CTGTCCTCTG |
| ID 4097419  | GGAGGTATAT | CTTTCGCTCC | GAGTCGGCA- | TTTTGGGCCG | CCGGGTTAT- | TGCTGACACG | CTGTCCTCTG |
| ID 4097420  | GGAGGTATAT | CTTTCGCTCC | GAGTCGGCA- | TTTTGGGCCG | CCGGGTTAT- | TGCTGACACG | CTGTCCTCTG |
| ID 4097421  | GGAGGTATAT | CTTTCGCTCC | GAGTCGGCA- | TTTTGGGCCG | CCGGGTTAT- | TGCTGACACG | CTGTCCTCTG |
| ID 4097422  | GGAGGTATAT | CTTTCGCTCC | GAGTCGGCA- | TTTTGGGCCG | CCGGGTTAT- | TGCTGACACG | CTGTCCTCTG |
| ID 4097428  | GGAGGTATAT | CTTTCGCTCC | GAGTCGGCA- | TTTTGGGCCG | CCGGGTTAT- | TGCTGACACG | CTGTCCTCTG |
| ID 4097429  | GGAGGTATAT | CTTTCGCTCC | GAGTCGGCA- | TTTTGGGCCG | CCGGGTTAT- | TGCTGACACG | CTGTCCTCTG |
| ID 4097430  | GGAGGTATAT | CTTTCGCTCC | GAGTCGGCA- | TTTTGGGCCG | CCGGGTTAT- | TGCTGACACG | CTGTCCTCTG |
| ID 4097431  | GGAGGTATAT | CTTTCGCTCC | GAGTCGGCA- | TTTTGGGCCG | CCGGGTTAT- | TGCTGACACG | CTGTCCTCTG |
| ID 4097432  | GGAGGTATAT | CTTTCGCTCC | GAGTCGGCA- | TTTTGGGCCG | CCGGGTTAT- | TGCTGACACG | CTGTCCTCTG |
| ID 4097447  | GGAGGTATAT | CTTTCGCTCC | GAGTCGGCA- | TTTTGGGCCG | CCGGGTTAT- | TGCTGACACG | CTGTCCTCTG |
| ID 4097522  | GGAGGTATAT | CTTTCGCTCC | GAGTCGGCA- | TTTTGGGCCG | CCGGGTTAT- | TGCTGACACG | CTGTCCTCTG |
| ID 4097600  | GGAGGTATAT | CTTTCGCTCC | GAGTCGGCA- | TTTTGGGCCG | CCGGGTTAT- | TGCTGACACG | CTGTCCTCTG |
| ID 4097613  | GGAGGTATAT | CTTTCGCTCC | GAGTCGGCA- | TTTTGGGCCG | CCGGGTTAT- | TGCTGACACG | CTGTCCTCTG |
| ID 4097651  | GGAGGTATAT | CTTTCGCTCC | GAGTCGGCA- | TTTTGGGCCG | CCGGGTTAT- | TGCTGACACG | CTGTCCTCTG |
| ID 4097652  | GGAGGTATAT | CTTTCGCTCC | GAGTCGGCA- | TTTTGGGCCG | CCGGGTTAT- | TGCTGACACG | CTGTCCTCTG |
| Consensus   | GGAGGTATAT | CTTTCGCTCC | GAGTCGGCA- | TTTTGGGCCG | CCGGGTTAT- | TGCTGACACG | CTGTCCTCTG |

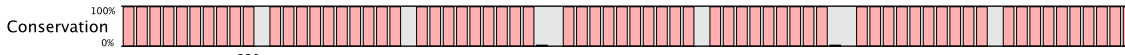

|             |            |            |           |
|-------------|------------|------------|-----------|
|             |            | 220        |           |
| U13369      | GCGACCTGTC | GCTGGAGAGG | TTGGGCCTC |
| ID 4097386  | GCGACCTGTC | GCTGGAGAGG | TTGGGCCTC |
| ID 4097387  | GCGACCTGTC | GCTGGAGAGG | TTGGGCCTC |
| ID 4097397  | GCGACCTGTC | GCTGGAGAGG | TTGGGCCTC |
| ID 4097398  | GCGACCTGTC | GCTGGAGAGG | TTGGGCCTC |
| ID 4097401  | GCGACCTGTC | GCTGGAGAGG | TTGGGCCTC |
| ID 4097408m | GCGACCTGTC | GCTGGAGAGG | TTGGGCCTC |
| ID 4097409  | GCGACCTGTC | GCTGGAGAGG | TTGGGCCTC |
| ID 4097412  | GCGACCTGTC | GCTGGAGAGG | TTGGGCCTC |
| ID 4097419  | GCGACCTGTC | GCTGGAGAGG | TTGGGCCTC |
| ID 4097420  | GCGACCTGTC | GCTGGAGAGG | TTGGGCCTC |
| ID 4097421  | GCGACCTGTC | GCTGGAGAGG | TTGGGCCTC |
| ID 4097422  | GCGACCTGTC | GCTGGAGAGG | TTGGGCCTC |
| ID 4097428  | GCGACCTGTC | GCTGGAGAGG | TTGGGCCTC |
| ID 4097429  | GCGACCTGTC | GCTGGAGAGG | TTGGGCCTC |
| ID 4097430  | GCGACCTGTC | GCTGGAGAGG | TTGGGCCTC |
| ID 4097431  | GCGACCTGTC | GCTGGAGAGG | TTGGGCCTC |
| ID 4097432  | GCGACCTGTC | GCTGGAGAGG | TTGGGCCTC |
| ID 4097447  | GCGACCTGTC | GCTGGAGAGG | TTGGGCCTC |
| ID 4097522  | GCGACCTGTC | GCTGGAGAGG | TTGGGCCTC |
| ID 4097600  | GCGACCTGTC | GCTGGAGAGG | TTGGGCCTC |
| ID 4097613  | GCGACCTGTC | GCTGGAGAGG | TTGGGCCTC |
| ID 4097651  | GCGACCTGTC | GCTGGAGAGG | TTGGGCCTC |
| ID 4097652  | GCGACCTGTC | GCTGGAGAGG | TTGGGCCTC |
| Consensus   | GCGACCTGTC | GCTGGAGAGG | TTGGGCCTC |

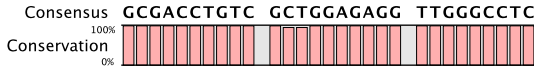

Supplement: pone.0002085.s001.pdf [file pone.0002085.s001.pdf]
